# Supplementary material
Source: PubMed Central journal article supplement (PMC556308)

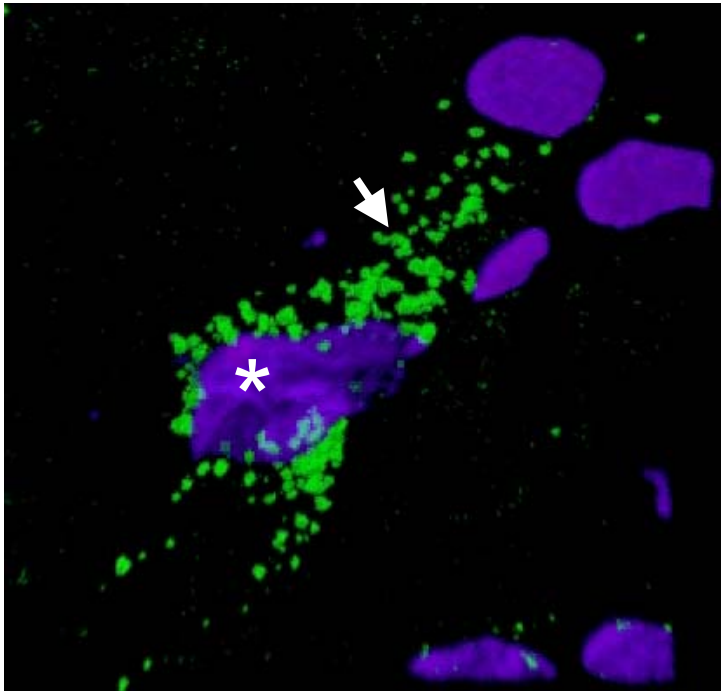

Supplement: pnas_102_16_5856__1.pdf [file pnas_102_16_5856__1.pdf]
